# Supplementary material
Source: PubMed Central journal article supplement (PMC7255387)
Supplement: NIHMS1569023-supplement-2.pdf [file NIHMS1569023-supplement-2.pdf]

**Table S1, Related to Figure 1:**

| <b>Individual</b>                   | <b>40291IMID</b>     | <b>LIS6801</b>       | <b>PAC3301</b>                      | <b>LIS7901</b>           | <b>LIS8800</b>            | <b>PAC2801</b>          | <b>DC7401</b>                 |
|-------------------------------------|----------------------|----------------------|-------------------------------------|--------------------------|---------------------------|-------------------------|-------------------------------|
| <b>Sex at birth</b>                 | Male                 | Female               | Male                                | Female                   | Male                      | Female                  | Male                          |
| <b>MRI abnormalities</b>            | BPPP, CSpZ, DCC, DWM | BPPP, CSpZ, DCC, DWM | BPPP, CSpZ, DCC, DWM, Chiari I      | BPPP, CSpZ, DCC, DWM     | BPPP, CSpZ, DCC, DWM      | BPPP, CSpZ, DCC, DWM    | BPPP, CSpZ, VL, DCC, Chiari I |
| <b>Seizures</b>                     | ES                   | ES                   | ES                                  | Focal                    | Focal                     | Focal, GTC              | Focal                         |
| <b>Neurodevelopmental diagnoses</b> | GDD                  | GDD                  | GDD, Echolalia                      | GDD, ID                  | GDD, ADHD, ASD, Anxiety   | GDD, ADHD, ASD, SIB, ID | ID                            |
| <b>Visual/Ocular</b>                | None                 | Unknown              | Esotropia, Amblyopia, Hypermetropia | Esotropia, Hypermetropia | Convergence insufficiency | Exotropia               | Exotropia                     |
| <b>Neurological Exam</b>            | Hypertonia           | Hypertonia           | Normal tone                         | Hypotonia, Dysmetria     | Hypotonia                 | Spasticity, Hypertonia  | Broad gait                    |
| <b>Head Circumference</b>           | 50.5 cm (53%ile)     | 50.25cm (47%ile)     | 49.5cm (64%ile)                     | 52.5cm (75%ile)          | 54 cm (88%ile)            | 51.5cm (41%ile)         | Unknown                       |
| <b>Evaluation Age</b>               | 3y11m                | 5y1m                 | 2y3m                                | 8y                       | 8y9m                      | 8y11m                   | 21yo                          |

Table of phenotypes exhibited by individuals with *CEP85L* variants. BPPL: bilateral posterior predominant pachygyria, CSpZ: cell sparse zone, DCC: dysmorphic corpus callosum, DWM: decreased white matter, VL: volume loss, GTC: generalized tonic clonic, ES: epileptic spasms, GDD: global developmental delay, ADHD: attention deficient hyperactive disorder, ASD: autism spectrum disorders, SIB: self-Injurious behavior, ID: intellectual disability

Table S2, Related to Figure 1:

| Individual                                       | PAC2801                      | LIS7901/LIS8801           | LIS6801                      | 40291IMID                      | DC7401                         | PAC3301                      |
|--------------------------------------------------|------------------------------|---------------------------|------------------------------|--------------------------------|--------------------------------|------------------------------|
| <b>Genomic Coordinates (GRch37/hg19)</b>         | chr6:g.118972428C>T          | chr6:g.118953611C>A       | chr6:g.118953675C>T          | chr6:g.118953666G>A            | chr6:g.118953654T>G            | chr6:g.118953649C>A          |
| <b>cDNA position (Transcript NM_001042475.3)</b> | c.5G>A                       | c.232+5G>T                | c.173G>A                     | c.182C>T                       | c.194A>C                       | c.199G>T                     |
| <b>Protein Position</b>                          | p.Trp2*                      | N/A                       | p.Ser58Asn                   | p.Ser61Phe                     | p.Asp65Ala                     | p.Gly67Cys                   |
| <b>Location</b>                                  | Exon 1                       | Intron 2                  | Exon 2                       | Exon 2                         | Exon 2                         | Exon 2                       |
| <b>SIFT (Prediction Score)</b>                   | N/A<br>(nonsense variant)    | N/A<br>(intronic variant) | Deleterious (score: 0)       | Deleterious (score: 0)         | Deleterious (score: 0)         | Deleterious (score: 0)       |
| <b>MutationTaster (Prediction Score)</b>         | Disease causing<br>(prob: 1) | N/A<br>(intronic variant) | Disease causing<br>(prob: 1) | Disease causing<br>(prob: 1)   | Disease causing<br>(prob: 1)   | Disease causing<br>(prob: 1) |
| <b>PolyPhen-2 (HumVar)</b>                       | N/A<br>(nonsense variant)    | N/A<br>(intronic variant) | PROBABLY<br>DAMAGING (0.997) | PROBABLY<br>DAMAGING (0.998)   | PROBABLY<br>DAMAGING (0.998)   | PROBABLY<br>DAMAGING (1.000) |
| <b>CADD (GRch37-v1.4)</b>                        | 17.24                        | 20.7                      | 26.2                         | 28                             | 27.1                           | 28.8                         |
| <b>M-CAP (Prediction score)</b>                  | N/A<br>(nonsense variant)    | N/A<br>(intronic variant) | Likely Benign (0.015)        | Possibly Pathogenic<br>(0.035) | Possibly Pathogenic<br>(0.049) | Likely Benign (0.020)        |
| <b>PhastCons (44-vertebrates)</b>                | 1                            | 0.99                      | 1                            | 1                              | 1                              | 1                            |
| <b>PhyloP (44-vertebrates)</b>                   | 1.5                          | 4.4                       | 4.4                          | 4.4                            | 3.68                           | 4.4                          |
| <b>gnomAD</b>                                    | 0                            | 0                         | 0                            | 0                              | 0                              | 0                            |
| <b>1000Genomes</b>                               | 0                            | 0                         | 0                            | 0                              | 0                              | Ta0                          |

Figure S1: Related to Figure 3

A

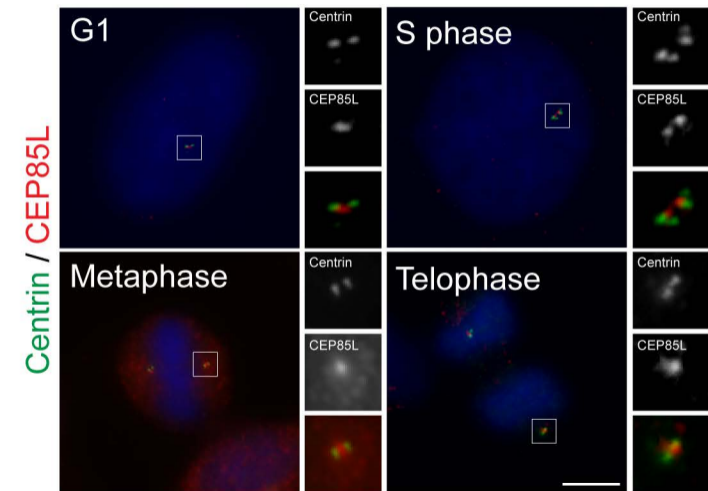

B

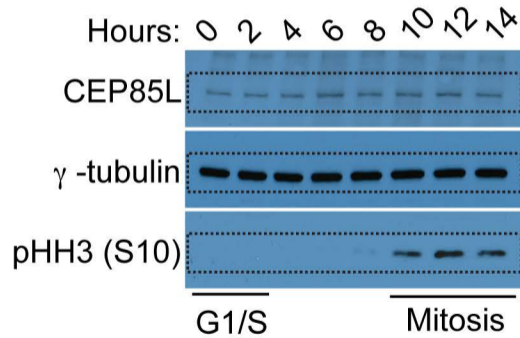

C

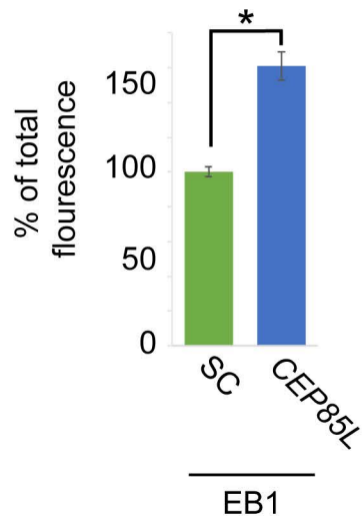

**Figure S1: CEP85L is a centrosomal protein, Related to Figure 3**

**A.** Asynchronous U2-OS cells co-stained for CEP85L (red) and Centrin (green) to determine the stage of the cell cycle. Scale bars represent 5 $\mu$ m for all images. **B.** Whole-cell lysates from thymidine-synchronized U2-OS cells harvested at the indicated time points and analyzed by immunoblot for CEP85L and phospho-Histone H3 (Ser 10).  $\gamma$ -tubulin served as a centrosomal loading control. **C.** Quantification of the fluorescence intensity of EB1 within 5 $\mu$ M of the centrosome expressed as the mean percentage  $\pm$  s.d. of the fluorescence intensities of SC cells. For all quantifications, 10 cells were analyzed per experiment (n=3). \* - p < 0.005 (Student's t-test).

Figure S2: Related to Figure 4

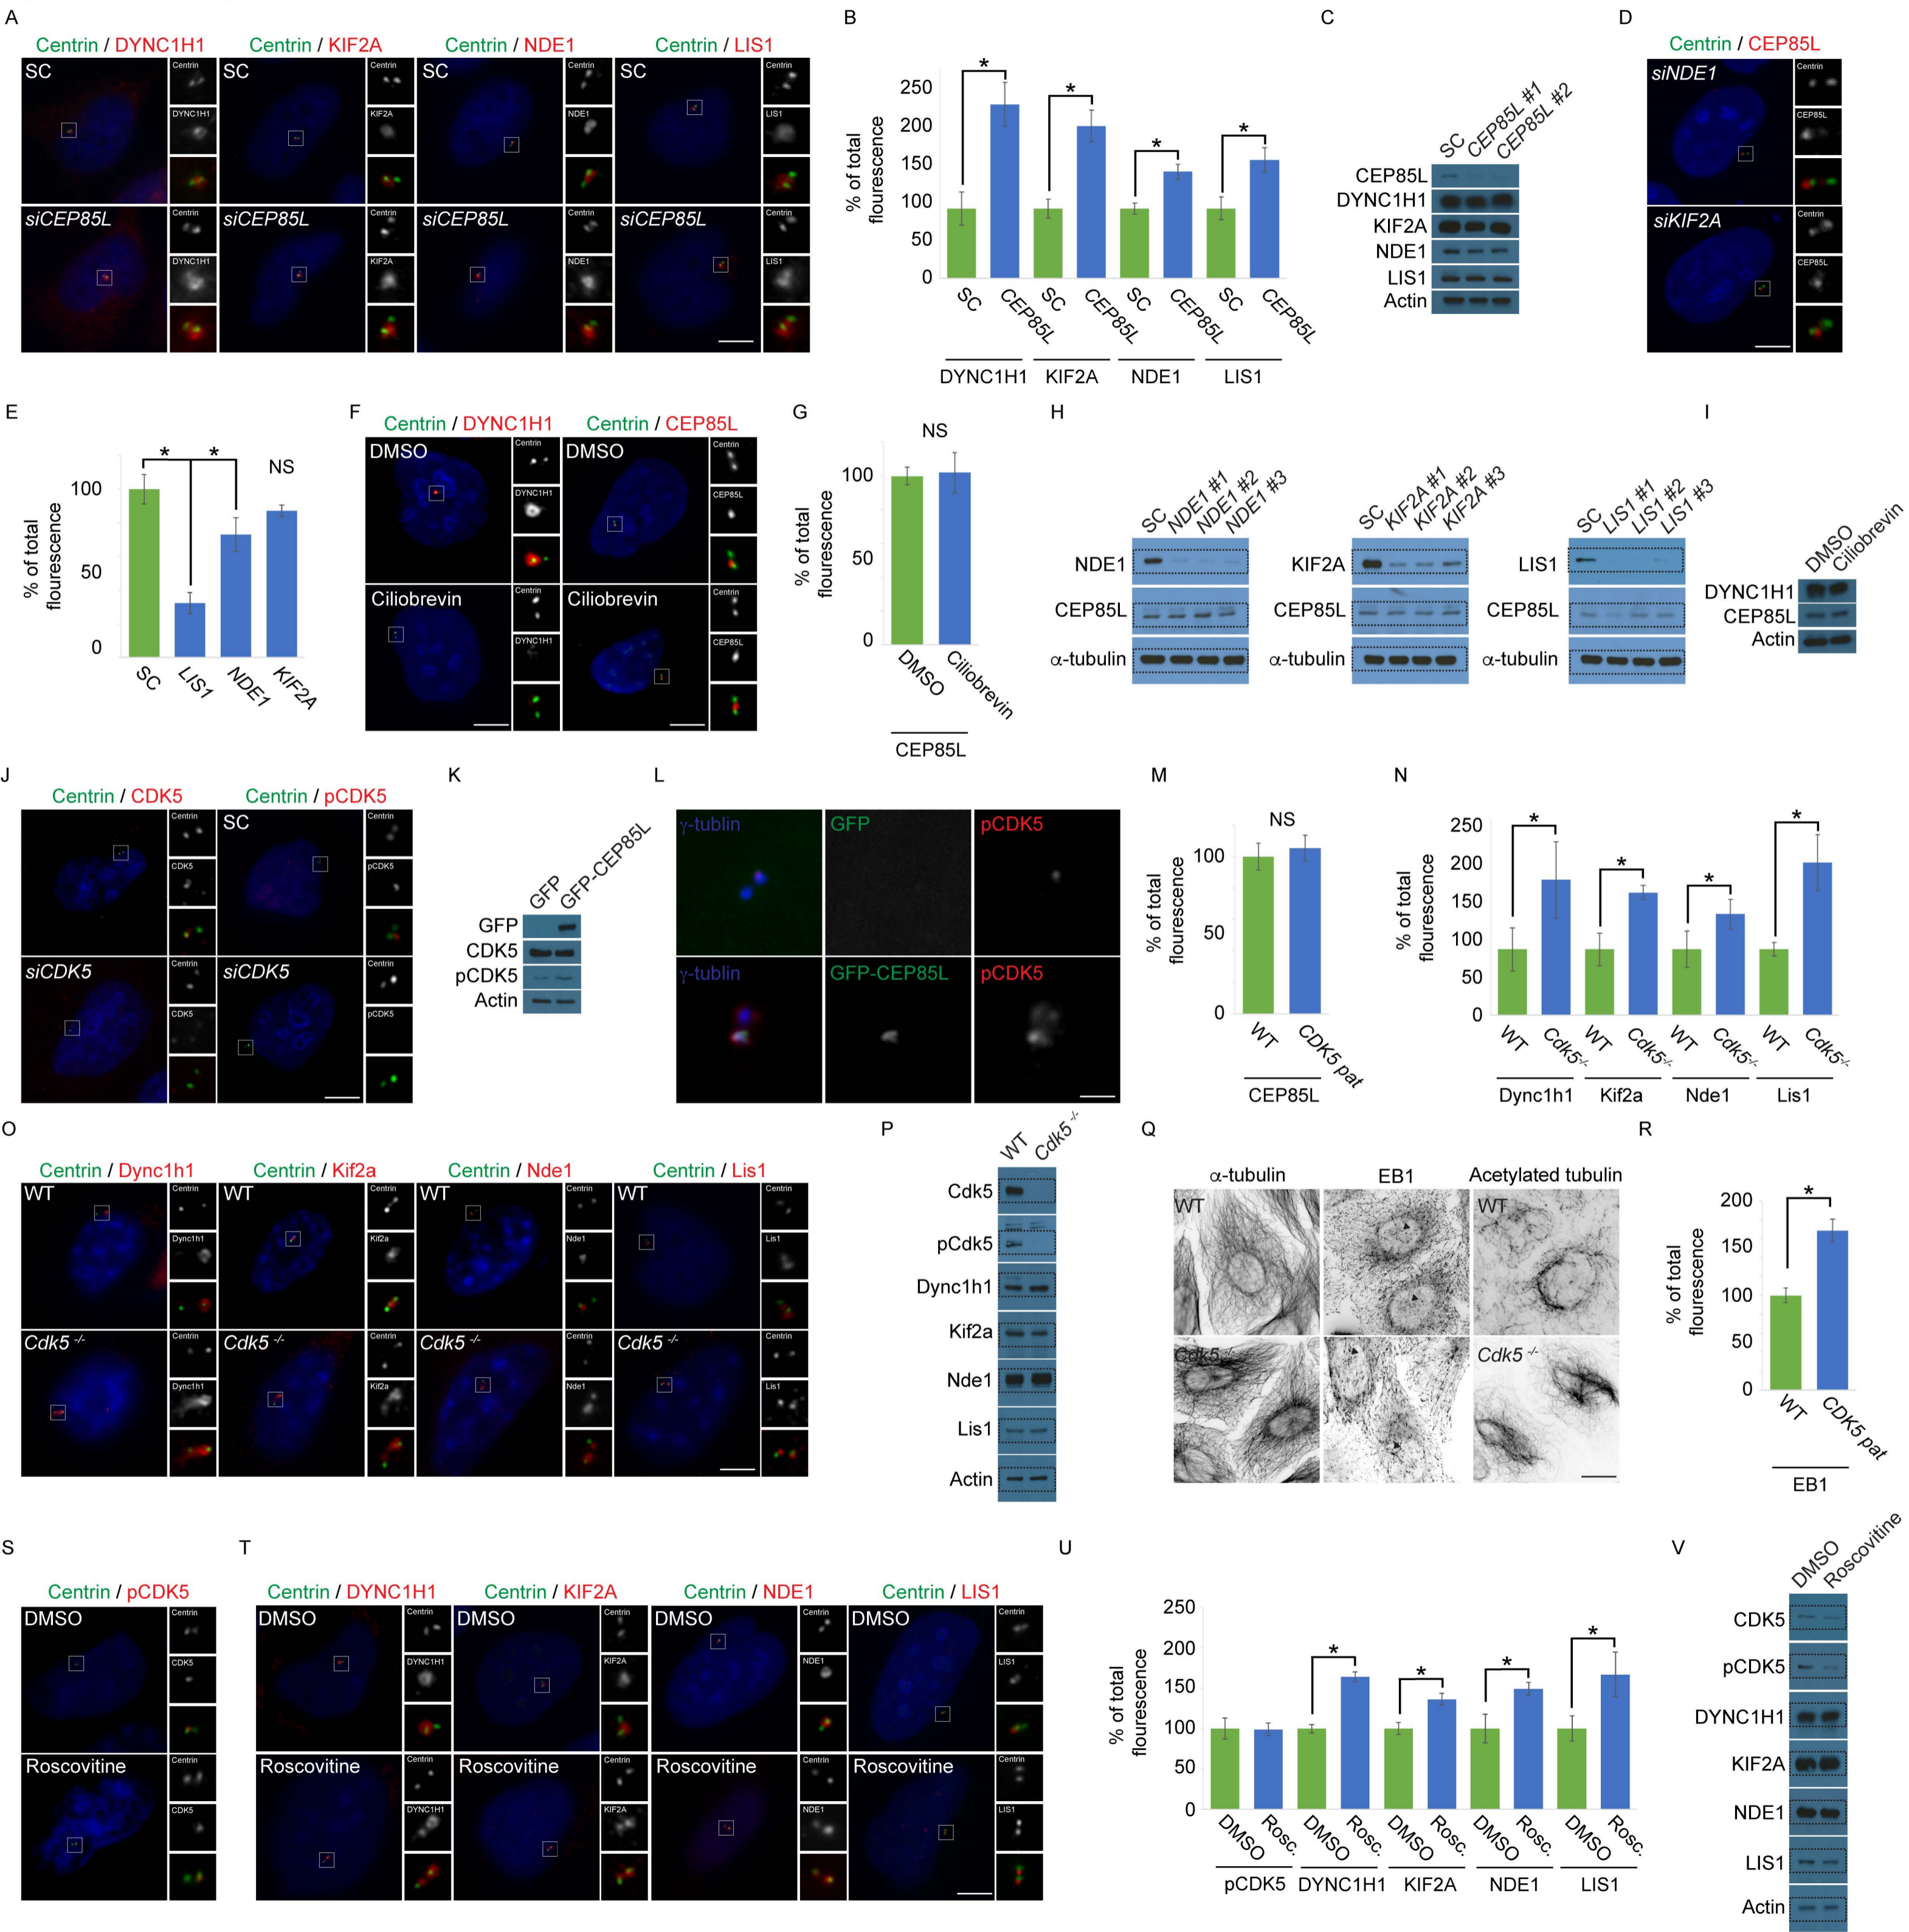

**Figure S2: CEP85L is required to localize and activate CDK5 at the centrosome, Related to Figure 4**

**A.** U2-OS cells transfected with SC or *CEP85L* #2 siRNA co-stained for Centrin (green) and DYNC1H1, KIF2A, NDE1 or LIS1. Scale bars represent 5 $\mu$ m for all images. **B.** Quantification of the mean fluorescence intensities  $\pm$  s.d. of centrosomal DYNC1H1, KIF2A, NDE1 and LIS1 in SC and *CEP85L* siRNA treated cells as expressed as the mean percentage  $\pm$  s.d. of the fluorescence intensities of SC cells. **C.** Total cell lysates from U2-OS cells transfected with siRNA to SC or *CEP85L* #1 or #2 were immunoblotted for CEP85L, DYNC1H1, KIF2A, NDE1 and LIS1. Actin served as a loading control. **D.** U2-OS cells transfected with siRNA to *NDE1* or *KIF2A* co-stained with Centrin (green) and CEP85L (red). **E.** Mean fluorescence intensity of CEP85L in SC, *LIS1*, *NDE1*, and *KIF2A* siRNA treated cells expressed as the mean percentage of the fluorescence intensities of SC cells. **F.** U2-OS cells treated with DMSO or the Dynein inhibitor Ciliobrevin co-stained for Centrin (green) and DYNC1H1 (red) or CEP85L (red). **G.** Quantification of the centrosomal fluorescence intensity of CEP85L in cells treated with DMSO or Ciliobrevin expressed as the mean percentage of the fluorescence intensities of DMSO treated cells. **H.** U2-OS cells transfected with SC, *NDE1* #1-3, *KIF2A* #1-3, and *LIS1* #1-3 siRNAs blotted for CEP85L and NDE1, KIF2A or LIS1.  $\alpha$ -tubulin served as a loading control. Boxed region represents specific bands. **I.** Western blot analysis of lysate from U2-OS treated with DMSO or Ciliobrevin probed with antibodies to DYNC1H1 and CEP85L. Actin served as a loading control. **J.** Immunofluorescence of SC and *CDK5* siRNA-transfected U2-OS cells co-stained for Centrin1 (green) and CDK5 (red) or pCDK5 (red). Scale bar represents 5 $\mu$ m for all images. **K.** Total cell lysate of U2-OS cells transfected with GFP or GFP-CEP85L for 5 hours were immunoblotted for GFP, CDK5 and pCDK5. Actin served as a loading control. **L.** Airyscan images of GFP and GFP-CEP85L (green) expressing U2-OS cells co-stained with antibodies to pCDK5 (red) and  $\gamma$ -tubulin (blue). Scale bar represents 1 $\mu$ m for Airyscan images. **M.** Quantification of the fluorescence intensities of CEP85L in WT and *CDK5 pat* cells expressed as the mean percentage of the fluorescence intensities of WT cells. **N.** Quantification of the mean fluorescence intensities  $\pm$  s.d. of centrosomal Dync1h1, Kif2a, Nde1 and Lis1 in WT and *Cdk5*<sup>-/-</sup> cells as expressed as the mean percentage  $\pm$  s.d. of the fluorescence intensities of WT cells. **O.** WT and *Cdk5*<sup>-/-</sup> mouse embryonic fibroblasts (MEFs) co-stained with antibodies to Centrin (green) and Dync1h1 (red), Nde1 (red), Kif2a (red), or Lis1 (red). **P.** Western blot analysis of whole cell lysates from WT and *Cdk5*<sup>-/-</sup> MEFs probed with antibodies to Cdk5, pCdk5, Dync1h1, Kif2a, Nde1 and Lis1. Actin served as a loading control. **Q.** Inverted images of WT and *Cdk5*<sup>-/-</sup> MEFs stained with  $\alpha$ -tubulin, EB1 or acetylated tubulin. Triangles denote the location of the centrosome. Scale bar 5 $\mu$ m for all images. **R.**

Quantification of the fluorescence intensity of EB1 within 5 $\mu$ M of the centrosome expressed as the mean percentage  $\pm$  s.d. of the fluorescence intensities of WT and *CDK5* patient fibroblasts. **S-T.** U2-OS cells treated with DMSO or Roscovitine were co-stained with antibodies to Centrin (green) and pCDK5 (red), DYNC1H1 (red), KIF2A (red), NDE1 (red), or LIS1 (red). **U.** Mean fluorescence intensity of pCDK5, DYNC1H1, KIF2A, NDE1, and LIS1 in DMSO or Roscovitine treated U2-OS cells expressed as the mean percentage of the fluorescence intensities of DMSO-treated control cells. For all quantifications, 10 cells were analyzed per experiment (n=3). \* - p < 0.005 (Student's t-test). **V.** Western blot analysis of CDK5, pCDK5, DYNC1H1, KIF2A, NDE1, and LIS1 in cell lysates from DMSO and Roscovitine treated U2-OS cells. Boxed areas represent specific bands.
